# Supplementary material for: Tree Species Composition and Diversity in Fire-Affected Areas of Miombo Woodlands, Central Mozambique
Source: MDPI journal article supplement (doi:10.3390/fire6010026), 2023-01-11
Supplement: s1 [file s1]

# Supplementary Material

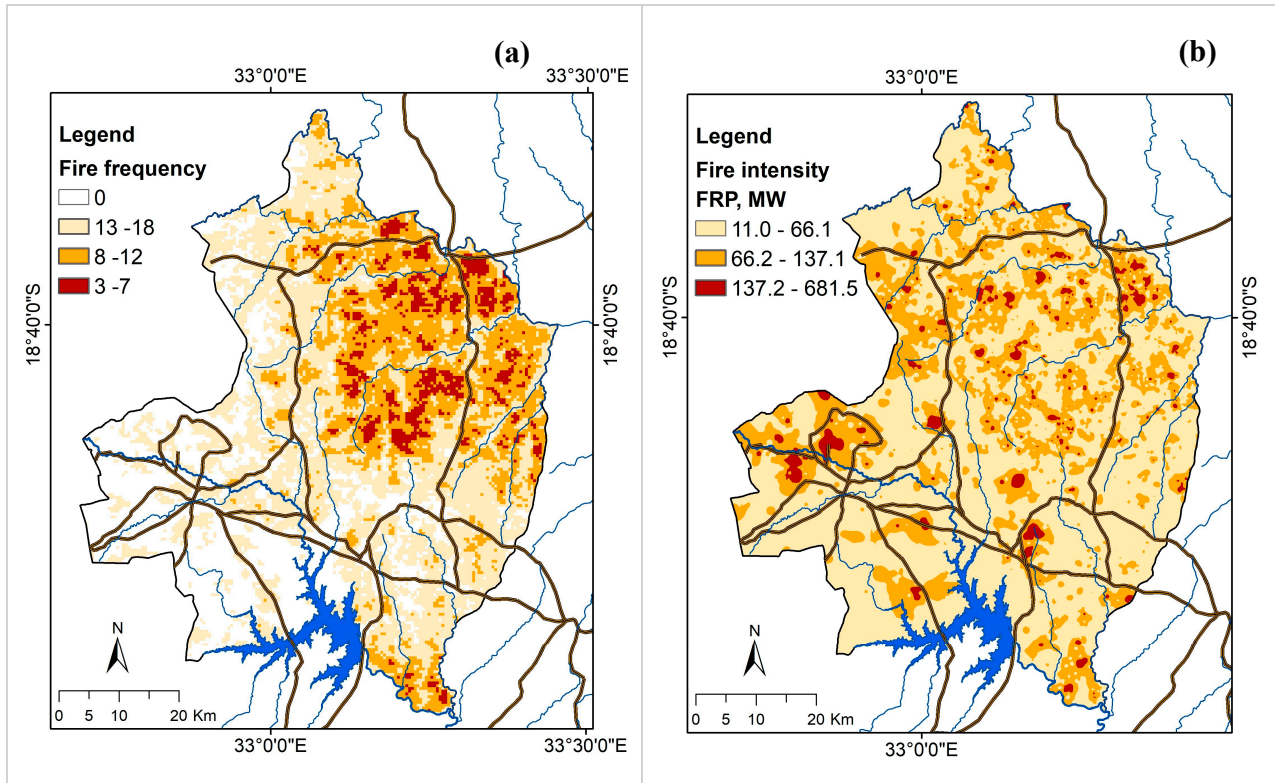

**Figure S1.** Spatial pattern distribution of fire frequency (a) and fire intensity (b) in the study area.  
Where: 0 = non-burn, 13-18 = low frequency, 8-12 = intermediate frequency, 3-7 = high frequency;  
11-66.1 = low intensity, 66.2-137.1 = intermediate intensity, 137.2-681.5 = high intensity

**Table S1.** Asymptotic diversity estimates along with related statistics

| Site | Diversity         | Observed | Estimator | s.e. | LCL  | UCL  |
|------|-------------------|----------|-----------|------|------|------|
| HfHi | Species richness  | 48.0     | 53.3      | 4.9  | 49.1 | 72.9 |
| HfHi | Shannon diversity | 16.5     | 17.0      | 0.7  | 16.5 | 18.4 |
| HfHi | Simpson diversity | 8.4      | 8.5       | 0.5  | 8.4  | 9.4  |
| HfLi | Species richness  | 59.0     | 67.0      | 6.0  | 61.1 | 88.8 |
| HfLi | Shannon diversity | 26.8     | 28.0      | 1.1  | 26.8 | 30.1 |
| HfLi | Simpson diversity | 17.6     | 18.0      | 0.9  | 17.6 | 19.8 |
| Ifii | Species richness  | 56.0     | 66.9      | 7.6  | 59.2 | 93.4 |
| Ifii | Shannon diversity | 30.8     | 34.7      | 2.3  | 30.8 | 39.2 |
| Ifii | Simpson diversity | 19.4     | 20.6      | 1.8  | 19.4 | 24.2 |
| LfHi | Species richness  | 50.0     | 50.6      | 1.0  | 50.1 | 55.9 |
| LfHi | Shannon diversity | 21.3     | 21.8      | 0.8  | 21.3 | 23.5 |
| LfHi | Simpson diversity | 11.1     | 11.2      | 0.7  | 11.1 | 12.7 |
| LfLi | Species richness  | 65.0     | 69.9      | 4.8  | 66.0 | 89.7 |
| LfLi | Shannon diversity | 21.1     | 21.4      | 0.6  | 21.1 | 22.7 |
| LfLi | Simpson diversity | 10.1     | 10.2      | 0.5  | 10.1 | 11.1 |

**Table S2.** Diversity estimates with rarefied and extrapolated samples

| <b>HfHi</b> |          |               |              |           |               |               |           |               |               |
|-------------|----------|---------------|--------------|-----------|---------------|---------------|-----------|---------------|---------------|
|             | <b>m</b> | <b>method</b> | <b>order</b> | <b>qD</b> | <b>qD.LCL</b> | <b>qD.UCL</b> | <b>SC</b> | <b>SC.LCL</b> | <b>SC.UCL</b> |
| 1           | 1        | interpolated  | 0            | 1         | 1             | 1             | 0.118     | 0.106         | 0.13          |
| 10          | 495      | interpolated  | 0            | 41.656    | 39.322        | 43.991        | 0.98      | 0.975         | 0.984         |
| 20          | 990      | observed      | 0            | 48        | 44.466        | 51.534        | 0.992     | 0.988         | 0.996         |
| 30          | 1459     | extrapolated  | 0            | 50.711    | 45.75         | 55.671        | 0.996     | 0.991         | 1.001         |
| 40          | 1980     | extrapolated  | 0            | 52.14     | 45.31         | 58.969        | 0.998     | 0.994         | 1.002         |

  

| <b>HfLi</b> |          |               |              |           |               |               |           |               |               |
|-------------|----------|---------------|--------------|-----------|---------------|---------------|-----------|---------------|---------------|
|             | <b>m</b> | <b>method</b> | <b>order</b> | <b>qD</b> | <b>qD.LCL</b> | <b>qD.UCL</b> | <b>SC</b> | <b>SC.LCL</b> | <b>SC.UCL</b> |
| 1           | 1        | interpolated  | 0            | 1         | 1             | 1             | 0.056     | 0.049         | 0.062         |
| 10          | 398      | interpolated  | 0            | 49.75     | 46.239        | 53.262        | 0.964     | 0.958         | 0.971         |
| 20          | 796      | observed      | 0            | 59        | 54.066        | 63.934        | 0.985     | 0.977         | 0.992         |
| 30          | 1173     | extrapolated  | 0            | 63.064    | 56.031        | 70.098        | 0.993     | 0.984         | 1.001         |
| 40          | 1592     | extrapolated  | 0            | 65.208    | 55.322        | 75.094        | 0.997     | 0.989         | 1.004         |

  

| <b>Ifii</b> |          |               |              |           |               |               |           |               |               |
|-------------|----------|---------------|--------------|-----------|---------------|---------------|-----------|---------------|---------------|
|             | <b>m</b> | <b>method</b> | <b>order</b> | <b>qD</b> | <b>qD.LCL</b> | <b>qD.UCL</b> | <b>SC</b> | <b>SC.LCL</b> | <b>SC.UCL</b> |
| 1           | 1        | interpolated  | 0            | 1         | 1             | 1             | 0.049     | 0.039         | 0.058         |
| 10          | 155      | interpolated  | 0            | 44.891    | 41.877        | 47.904        | 0.886     | 0.869         | 0.903         |
| 20          | 311      | observed      | 0            | 56        | 51.395        | 60.605        | 0.955     | 0.938         | 0.972         |
| 30          | 458      | extrapolated  | 0            | 60.947    | 54.565        | 67.329        | 0.976     | 0.957         | 0.995         |
| 40          | 622      | extrapolated  | 0            | 63.858    | 55.29         | 72.426        | 0.988     | 0.971         | 1.004         |

  

| <b>LfHi</b> |          |               |              |           |               |               |           |               |               |
|-------------|----------|---------------|--------------|-----------|---------------|---------------|-----------|---------------|---------------|
|             | <b>m</b> | <b>method</b> | <b>order</b> | <b>qD</b> | <b>qD.LCL</b> | <b>qD.UCL</b> | <b>SC</b> | <b>SC.LCL</b> | <b>SC.UCL</b> |
| 1           | 1        | interpolated  | 0            | 1         | 1             | 1             | 0.089     | 0.078         | 0.1           |
| 10          | 518      | interpolated  | 0            | 45.809    | 43.465        | 48.153        | 0.984     | 0.981         | 0.988         |
| 20          | 1037     | observed      | 0            | 50        | 47.058        | 52.942        | 0.997     | 0.994         | 1             |
| 30          | 1528     | extrapolated  | 0            | 50.517    | 46.651        | 54.383        | 1         | 0.997         | 1.003         |
| 40          | 2074     | extrapolated  | 0            | 50.559    | 45.69         | 55.429        | 1         | 0.998         | 1.002         |

  

| <b>LfLi</b> |          |               |              |           |               |               |           |               |               |
|-------------|----------|---------------|--------------|-----------|---------------|---------------|-----------|---------------|---------------|
|             | <b>m</b> | <b>method</b> | <b>order</b> | <b>qD</b> | <b>qD.LCL</b> | <b>qD.UCL</b> | <b>SC</b> | <b>SC.LCL</b> | <b>SC.UCL</b> |
| 1           | 1        | interpolated  | 0            | 1         | 1             | 1             | 0.098     | 0.091         | 0.105         |
| 10          | 1155     | interpolated  | 0            | 58.946    | 55.764        | 62.127        | 0.991     | 0.989         | 0.992         |
| 20          | 2310     | observed      | 0            | 65        | 61.107        | 68.893        | 0.997     | 0.995         | 0.999         |
| 30          | 3404     | extrapolated  | 0            | 67.408    | 62.411        | 72.405        | 0.998     | 0.997         | 1             |
| 40          | 4620     | extrapolated  | 0            | 68.724    | 62.415        | 75.034        | 0.999     | 0.998         | 1.001         |

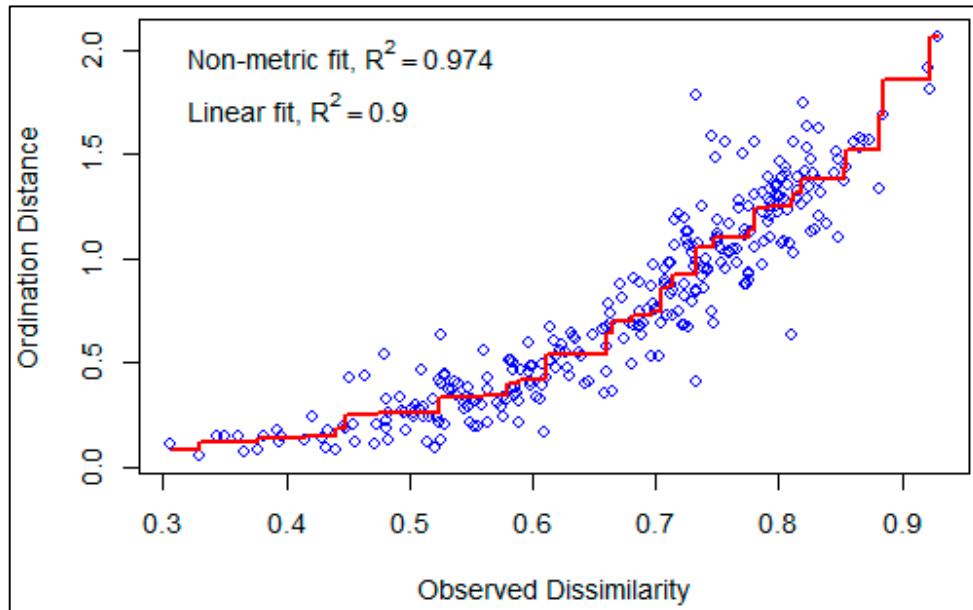

Figure S2. NMDS Stress plot

Table S3. Map accuracy assessment

| Error matrix (confusion matrix): |          |          |         |       |               |                       |        |
|----------------------------------|----------|----------|---------|-------|---------------|-----------------------|--------|
| Classified values                |          |          |         |       |               |                       |        |
|                                  |          | Unburned | Burned  | Total | User accuracy | Total class area (ha) | Wi     |
| Thematic raster classes          | Unburned | 301      | 4       | 305   | 0.98689       | 337701.02483          | 0.7705 |
|                                  | Burned   | 17       | 74      | 91    | 0.81319       | 100589.05431          | 0.2295 |
|                                  | Total    | 318      | 78      | 396   |               | 438290.07914          |        |
| Producer accuracy                |          | 0.94654  | 0.94872 |       | 0.94697       |                       |        |

| Error matrix of estimated area proportion: |          |          |         |        |
|--------------------------------------------|----------|----------|---------|--------|
| Classified values                          |          |          |         |        |
|                                            |          | Unburned | Burned  | Wi     |
| Thematic raster classes                    | Unburned | 0.76039  | 0.0101  | 0.7705 |
|                                            | Burned   | 0.04287  | 0.18663 | 0.2295 |
|                                            | Total    | 0.80327  | 0.19673 |        |

**Quadratic error matrix of estimated area proportion:**

|                            |          | Classified values |         |
|----------------------------|----------|-------------------|---------|
|                            |          | Unburned          | Burned  |
| Thematic raster<br>classes | Unburned | 3e-05             | 3e-05   |
|                            | Burned   | 9e-05             | 9e-05   |
|                            | Total    | 0.01069           | 0.01069 |

**Accuracy matrices:****User's accuracy matrix of estimated area proportion:**

|                            |          | Classified values |         |
|----------------------------|----------|-------------------|---------|
|                            |          | Unburned          | Burned  |
| Thematic raster<br>classes | Unburned | 0.98689           | 0.01311 |
|                            | Burned   | 0.18681           | 0.81319 |

**Producer's accuracy matrix of estimated area proportion:**

|                            |          | Classified values |         |
|----------------------------|----------|-------------------|---------|
|                            |          | Unburned          | Burned  |
| Thematic raster<br>classes | Unburned | 0.94663           | 0.05136 |
|                            | Burned   | 0.05337           | 0.94864 |

**Overall Accuracy: 0.94702****Kappa: 0.842****Class area adjusted table:**

|                   | Area (ha)    | Error      | Lower limit  | Upper limit  |
|-------------------|--------------|------------|--------------|--------------|
| <b>1 Unburned</b> | 352063.52072 | 4683.38548 | 342884.08519 | 361242.95626 |
| <b>2 Burned</b>   | 86226.55841  | 4683.38548 | 77047.12288  | 95405.99395  |
| <b>Total</b>      | 438290.07914 |            |              |              |

**Table S4. List of the species**

| Abbreviation species | Scientific name              |
|----------------------|------------------------------|
| Acac.nig             | <i>Acacia nigrecensis</i>    |
| Acac.sen             | <i>Acacia senegal</i>        |
| Acacia.sp            | <i>Acacia sp</i>             |
| Acac.wilk            | <i>Acacia wilkiana</i>       |
| Afze.qua             | <i>Afzelia quanzensis</i>    |
| Albi.adi             | <i>Albizia adianthifolia</i> |

|           |                                    |
|-----------|------------------------------------|
| Albi.for  | <i>albizia forbesii</i>            |
| Albi.glab | <i>Albizia glaberrima</i>          |
| Albi.ver  | <i>Albizia versicolor</i>          |
| Anno.sen  | <i>Annona senegalensis</i>         |
| Anti.ven  | <i>Antidesma venosum</i>           |
| Bauh.pet  | <i>Bauhinia petersiana</i>         |
| Berc.dis  | <i>Berchemia discolor</i>          |
| Bolu.spe  | <i>Bolusanthus speciosus</i>       |
| Brach.boe | <i>Brachystegia boehmii</i>        |
| Brach.gla | <i>Brachystegia glaucescens</i>    |
| Brach.spi | <i>Brachystegia spiciformis</i>    |
| Brac.uti  | <i>Brachystegia utilis</i>         |
| Breo.sal  | <i>Breonadia salicina</i>          |
| Brid.cat  | <i>Bridelia cathartica</i>         |
| Brid.mic  | <i>Bridelia micrantha</i>          |
| Burk.afri | <i>Burkea africana</i>             |
| Cass.abb  | <i>Cassia abbreviata</i>           |
| Comb.api  | <i>Combretum apiculatum</i>        |
| Comb.coll | <i>Combretum collinum</i>          |
| Comb.mol  | <i>Combretum molle</i>             |
| Comb.pan  | <i>Combretum paniculatum</i>       |
| Comb.sp   | <i>Combretum sp</i>                |
| Cord.long | <i>Cordatum longiculata</i>        |
| Cros.feb  | <i>Crossopteryx febrifuga</i>      |
| Cuss.arb  | <i>Cussonia arborea</i>            |
| Dalb.mel  | <i>Dalbergia melanoxylon</i>       |
| Dich.cin  | <i>Dichrostachys cinerea</i>       |
| Dios.kir  | <i>Diospyros kirkii</i>            |
| Dios.lyc  | <i>Diospyros lycioides</i>         |
| Dios.squ  | <i>Diospyros squarrosa</i>         |
| Dios.usa  | <i>Diospyros usambarensis</i>      |
| Dipl.cond | <i>Diplorhynchus condylocarpon</i> |
| Ehre.amo  | <i>Ehretia amoena</i>              |
| Elep.goe  | <i>Elephantorrhiza goetz</i>       |
| Eryt.afr  | <i>Erythrophleum africanum</i>     |
| Faur.roc  | <i>Faurea rochetiana</i>           |
| Flac.ind  | <i>Flacourtia indica</i>           |
| Gard.sp   | <i>Gardenia sp</i>                 |
| Gard.vulk | <i>Gardenia vulkens</i>            |
| Grew.flu  | <i>Grewia flavescens</i>           |
| Gymn.het  | <i>Gymnosporia heterophylla</i>    |
| Hola.pub  | <i>Holarrhena pubescens</i>        |
| Hyme.aci  | <i>Hymenocardia acida</i>          |
| Hype.micr | <i>Hyperacanthus microphyllus</i>  |

|                 |                                          |
|-----------------|------------------------------------------|
| Julb.glo        | <i>Julbernardia globiflora</i>           |
| Lannea.discolor | <i>Lannea discolor</i>                   |
| Lann.sch        | <i>Lannea schweinfurthii</i>             |
| Lann.stu        | <i>Lannea stuhlmannii</i>                |
| Marg.dis        | <i>Margaritaria discoidea</i>            |
| Mark.obt        | <i>Markhamia obtusifolia</i>             |
| Mill.stu        | <i>Millettia stuhlmannii</i>             |
| Mond.ser        | <i>Monduleia sericea</i>                 |
| Mono.eng        | <i>Monotes glaber</i>                    |
| Ochn.lep        | <i>Ochna leptoclada</i>                  |
| Ochn.nat        | <i>Ochna natalitia</i>                   |
| Olax.dis        | <i>Olax dissitiflora</i>                 |
| Oogo.ori        | <i>Ogonia orientalis</i>                 |
| Oogo.sp         | <i>Ogonia sp</i>                         |
| Ormo.tri        | <i>Ormocarpum trichocarpum</i>           |
| Ozor.obo        | <i>Ozoroa obovata</i>                    |
| Pari.cur        | <i>Parinari curatellifolia</i>           |
| Peri.ang        | <i>Pericopsis angolensis</i>             |
| Phil.mic        | <i>Philantus micranta</i>                |
| Phil.vio        | <i>Philenoptera violacea</i>             |
| Pili.tho        | <i>Piliostigma thonningii</i>            |
| Podr.bry        | <i>Podranea brycei</i>                   |
| Protea.sp       | <i>Protea sp</i>                         |
| Pseu.map        | <i>Pseudolachnostylis maprouneifolia</i> |
| Psice.esp       | <i>Psicero espermum</i>                  |
| Ptel.myr        | <i>Pteleopsis myrtifolia</i>             |
| Pter.ang        | <i>Pterocarpus angolensis</i>            |
| Pter.rot        | <i>Pterocarpus rotundifolius</i>         |
| Rhigosum.sp     | <i>Rhigosum sp</i>                       |
| Rure.ori        | <i>Rureira orientalis</i>                |
| Allo.afr        | <i>Allophylus africanus</i>              |
| Schr.ala        | <i>Schrebera alata</i>                   |
| Scle.bir        | <i>Sclerocarya birrea</i>                |
| Secu.long       | <i>Securidaca longipedunculata</i>       |
| Ster.pen        | <i>Sterculia pendicula</i>               |
| Stry.ara        | <i>Strychnos aralacea</i>                |
| Stry.mad        | <i>Strychnos madagascariensis</i>        |
| Stry.spi        | <i>Strychnos spinosa</i>                 |
| Swar.mad        | <i>Swartzia madagascariensis</i>         |
| Syzy.cor        | <i>Syzygium cordatum</i>                 |
| Tabe.ele        | <i>Tabernaemontana elegans</i>           |
| Term.brac       | <i>Terminalia brachystemma</i>           |
| Term.ser        | <i>Terminalia sericea</i>                |

|            |                              |
|------------|------------------------------|
| Thes.gar   | <i>Thespesia garckeana</i>   |
| Trem.ori   | <i>Trema orientalis</i>      |
| Uapa.kir   | <i>Uapaca kirkiana</i>       |
| Uvaria.sp  | <i>Uvaria sp</i>             |
| Vach.nig   | <i>Vachellia nigrescens</i>  |
| Vach.sen   | <i>Vachellia senegal</i>     |
| Vang.ran   | <i>Vangueira randii</i>      |
| Vaxe.rob   | <i>Vaxelia robusta</i>       |
| Vaxelia.sp | <i>Vaxelia sp</i>            |
| Vern.col   | <i>Vernonia colorata</i>     |
| Vite.don   | <i>Vitex doniana</i>         |
| Vite.pay   | <i>Vitex payson</i>          |
| Vitex.sp   | <i>Vitex sp</i>              |
| Xero.stu   | <i>Xeroderis stuhlmannii</i> |
| Xime.am    | <i>Ximenia americana</i>     |
| Zizi.abi   | <i>Ziziphus abyssinica</i>   |
| Zizi.sp    | <i>Ziziphus sp</i>           |

---
